# Supplementary material for: Structures and luminescence properties of diethyldithiocarbamate-bridged polynuclear gold(i) cluster complexes with diphosphine/triphosphine
Source: Royal Society of Chemistry journal article supplement (doi:10.1039/c5ra01831e), 2015-01-01
Supplement: c5ra01831e1.pdf [file c5ra01831e1.pdf]

# Electronic Supporting Information

## Structures and Luminescent Properties of Diethyldithiocarbamate-Bridged Polynuclear Gold(I) Cluster Complexes with Diphosphine/Triphosphine

Jia Li,<sup>b</sup> Xiao-Feng Zhu,<sup>a</sup> Li-Yi Zhang<sup>b</sup> and Zhong-Ning Chen<sup>a,b\*</sup>

<sup>a</sup> *College of Chemistry, Fuzhou University, Fuzhou, Fujian 350002, China*

*E-mail: czn@ffirsm.ac.cn*

<sup>b</sup> *State Key Laboratory of Structural Chemistry, Fujian Institute of Research on the Structure of Matter, Chinese Academy of Sciences, Fuzhou, Fujian, 350002, China*

**Table S1.** Crystallographic Data of **3**·CH<sub>2</sub>Cl<sub>2</sub>, **4**·2CH<sub>2</sub>Cl<sub>2</sub>, **5**·2CH<sub>2</sub>Cl<sub>2</sub>·H<sub>2</sub>O and **6**.

|                                                | <b>3</b> CH <sub>2</sub> Cl <sub>2</sub>                                                                                                         | <b>4</b> 2CH <sub>2</sub> Cl <sub>2</sub>                                                                                               | <b>5</b> 2CH <sub>2</sub> Cl <sub>2</sub> ·H <sub>2</sub> O                                                            | <b>6</b>                                                                                                                        |
|------------------------------------------------|--------------------------------------------------------------------------------------------------------------------------------------------------|-----------------------------------------------------------------------------------------------------------------------------------------|------------------------------------------------------------------------------------------------------------------------|---------------------------------------------------------------------------------------------------------------------------------|
| empirical formula                              | C <sub>50</sub> H <sub>58</sub> Au <sub>4</sub> Cl <sub>2</sub> F <sub>6</sub> N <sub>3</sub><br>O <sub>3</sub> P <sub>2</sub> S <sub>6</sub> Sb | C <sub>55</sub> H <sub>68</sub> Au <sub>4.5</sub> Cl <sub>2</sub> F <sub>9</sub> N<br>4P <sub>2</sub> S <sub>8</sub> Sb <sub>1.50</sub> | C <sub>54</sub> H <sub>60</sub> Au <sub>4</sub> Cl <sub>2</sub> F <sub>6</sub> N<br>3OP <sub>2</sub> S <sub>6</sub> Sb | C <sub>83</sub> H <sub>96</sub> Au <sub>6</sub> F <sub>18</sub> N <sub>3</sub> P <sub>6</sub><br>S <sub>6</sub> Sb <sub>3</sub> |
| formula weight                                 | 2049.81                                                                                                                                          | 2414.43                                                                                                                                 | 2115.87                                                                                                                | 3402.86                                                                                                                         |
| crystal system                                 | monoclinic                                                                                                                                       | Triclinic                                                                                                                               | orthorhombic                                                                                                           | monoclinic                                                                                                                      |
| space group                                    | <i>P</i> 2 <sub>1</sub> / <i>n</i>                                                                                                               | <i>P</i> $\bar{1}$                                                                                                                      | <i>Pbcn</i>                                                                                                            | <i>P</i> 2/ <i>c</i>                                                                                                            |
| a, Å                                           | 18.670(4)                                                                                                                                        | 13.747(6)                                                                                                                               | 15.586(4)                                                                                                              | 16.476(6)                                                                                                                       |
| b, Å                                           | 16.820(3)                                                                                                                                        | 14.952(6)                                                                                                                               | 27.054(6)                                                                                                              | 19.474(8)                                                                                                                       |
| c, Å                                           | 22.720(5)                                                                                                                                        | 19.077(9)                                                                                                                               | 33.449(8)                                                                                                              | 18.238(7)                                                                                                                       |
| α, °                                           | 90                                                                                                                                               | 93.190(5)                                                                                                                               | 90                                                                                                                     | 90                                                                                                                              |
| β, °                                           | 110.933(3)                                                                                                                                       | 107.365(6)                                                                                                                              | 90                                                                                                                     | 95.004(4)                                                                                                                       |
| γ, °                                           | 90                                                                                                                                               | 97.674(5)                                                                                                                               | 90                                                                                                                     | 90                                                                                                                              |
| V, Å <sup>3</sup>                              | 6664(2)                                                                                                                                          | 3690(3)                                                                                                                                 | 14104(6)                                                                                                               | 5830(4)                                                                                                                         |
| Z                                              | 4                                                                                                                                                | 2                                                                                                                                       | 8                                                                                                                      | 2                                                                                                                               |
| ρ <sub>calcd</sub> , g/cm <sup>-3</sup>        | 2.043                                                                                                                                            | 2.173                                                                                                                                   | 1.993                                                                                                                  | 1.939                                                                                                                           |
| μ, mm <sup>-1</sup>                            | 9.542                                                                                                                                            | 9.855                                                                                                                                   | 9.021                                                                                                                  | 8.457                                                                                                                           |
| radiation (λ /Å)                               | 0.71073                                                                                                                                          | 0.71073                                                                                                                                 | 0.71073                                                                                                                | 0.71073                                                                                                                         |
| temp, (K)                                      | 293(2)                                                                                                                                           | 293(2)                                                                                                                                  | 293(2)                                                                                                                 | 293(2)                                                                                                                          |
| R1(F <sub>o</sub> ) <sup>a</sup>               | 0.0624                                                                                                                                           | 0.0549                                                                                                                                  | 0.0509                                                                                                                 | 0.0782                                                                                                                          |
| wR2(F <sub>o</sub> <sup>2</sup> ) <sup>b</sup> | 0.1842                                                                                                                                           | 0.1839                                                                                                                                  | 0.1522                                                                                                                 | 0.2076                                                                                                                          |
| GOF                                            | 1.028                                                                                                                                            | 0.947                                                                                                                                   | 1.094                                                                                                                  | 0.983                                                                                                                           |

<sup>a</sup> R1 =  $\Sigma|F_o - F_c|/\Sigma F_o$     <sup>b</sup> wR2 =  $\Sigma[w(F_o^2 - F_c^2)^2]/\Sigma[w(F_o^2)]^{1/2}$

**Table S2.** Selected Bonding Distances (Å) and Angles (°) of **3** CH<sub>2</sub>Cl<sub>2</sub>, **4** 2CH<sub>2</sub>Cl<sub>2</sub>, **5** 2CH<sub>2</sub>Cl<sub>2</sub> H<sub>2</sub>O and **6**.

| <b>3</b> 3H <sub>2</sub> O |            | <b>4</b> 2CH <sub>2</sub> Cl <sub>2</sub> |            | <b>5</b> 2CH <sub>2</sub> Cl <sub>2</sub> H <sub>2</sub> O |            | <b>6</b>     |            |
|----------------------------|------------|-------------------------------------------|------------|------------------------------------------------------------|------------|--------------|------------|
| Au1-P1                     | 2.267(3)   | Au1-P1                                    | 2.278(4)   | Au1-P1                                                     | 2.284(3)   | Au1-P1       | 2.282(4)   |
| Au1-S1                     | 2.311(3)   | Au1-S1                                    | 2.338(4)   | Au1-S1                                                     | 2.327(4)   | Au1-S1       | 2.345(4)   |
| Au1-Au2                    | 2.9725(8)  | Au1-Au2                                   | 3.1078(14) | Au1-Au2                                                    | 3.0514(10) | Au1-Au2      | 2.9244(12) |
| Au2-S2                     | 2.288(3)   | Au2-S2                                    | 2.281(5)   | Au2-S2                                                     | 2.295(4)   | Au1-Au1#2    | 3.1901(16) |
| Au2-S3                     | 2.273(4)   | Au2-S3                                    | 2.302(5)   | Au2-S3                                                     | 2.290(4)   | Au2-P2       | 2.271(4)   |
| Au2-Au3                    | 2.9376(7)  | Au2-Au3                                   | 2.9762(16) | Au2-Au3                                                    | 2.9288(9)  | Au2-S2       | 2.348(4)   |
| Au3-S4                     | 2.265(4)   | Au3-S4                                    | 2.291(5)   | Au3-S4                                                     | 2.291(4)   | Au2-Au3      | 3.1952(13) |
| Au3-S5                     | 2.291(4)   | Au3-S5                                    | 2.287(5)   | Au3-S5                                                     | 2.285(4)   | Au3-P3       | 2.288(5)   |
| Au3-Au4                    | 2.9684(8)  | Au3-Au4                                   | 2.9834(16) | Au3-Au4                                                    | 2.9927(9)  | Au3-S3       | 2.344(5)   |
| Au4-P2                     | 2.270(3)   | Au4-P2                                    | 2.280(4)   | Au4-P2                                                     | 2.278(3)   | Au3-Au3#1    | 2.9987(14) |
| Au4-S6                     | 2.315(3)   | Au4-S6                                    | 2.342(5)   | Au4-S6                                                     | 2.310(4)   |              |            |
|                            |            | Au5-S7                                    | 2.330(4)   |                                                            |            |              |            |
|                            |            | Au5-S8                                    | 2.355(4)   |                                                            |            |              |            |
| P1-Au1-S1                  | 172.72(11) | P1-Au1-S1                                 | 172.76(15) |                                                            |            | P1-Au1-S1    | 175.79(16) |
| P1-Au1-Au2                 | 102.13(7)  | P1-Au1-Au2                                | 105.37(10) | P1-Au1-S1                                                  | 166.47(12) | P1-Au1-Au2   | 97.67(10)  |
| S1-Au1-Au2                 | 82.95(7)   | S1-Au1-Au2                                | 81.81(11)  | P1-Au1-Au2                                                 | 112.74(8)  | S1-Au1-Au2   | 81.95(11)  |
| S2-Au2-S3                  | 169.22(13) | S2-Au2-S3                                 | 166.87(17) | S1-Au1-Au2                                                 | 80.64(10)  | P1-Au1-Au1#2 | 108.15(10) |
| S2-Au2-Au3                 | 97.01(7)   | S2-Au2-Au3                                | 94.51(12)  | S2-Au2-S3                                                  | 168.85(15) | S1-Au1-Au1#2 | 73.31(10)  |
| S3-Au2-Au3                 | 91.31(9)   | S3-Au2-Au3                                | 89.16(11)  | S2-Au2-Au3                                                 | 94.75(10)  | Au2-Au1-Au1# | 150.68(2)  |
| S2-Au2-Au1                 | 83.46(7)   | S2-Au2-Au1                                | 75.28(12)  | S3-Au2-Au3                                                 | 90.50(10)  | P2-Au2-S2    | 177.81(14) |
| S3-Au2-Au1                 | 92.53(9)   | S3-Au2-Au1                                | 113.27(12) | S2-Au2-Au1                                                 | 79.71(11)  | P2-Au2-Au1   | 96.02(10)  |
| Au1-Au2-Au3                | 151.25(2)  | Au1-Au2-Au3                               | 121.96(3)  | S3-Au2-Au1                                                 | 107.29(11) | S2-Au2-Au1   | 85.39(11)  |
| S4-Au3-S5                  | 172.63(10) | S4-Au3-S5                                 | 176.78(16) | Au1-Au2-Au3                                                | 112.78(3)  | P2-Au2-Au3   | 103.05(10) |
| S5-Au3-Au2                 | 95.01(9)   | S5-Au3-Au2                                | 96.22(12)  | S4-Au3-S5                                                  | 176.81(16) | S2-Au2-Au3   | 74.86(10)  |
| S4-Au3-Au2                 | 91.21(10)  | S4-Au3-Au2                                | 86.77(11)  | S5-Au3-Au2                                                 | 93.78(10)  | P3-Au3-S3    | 172.34(16) |
| S5-Au3-Au2                 | 95.01(9)   | S5-Au3-Au2                                | 96.22(12)  | S4-Au3-Au2                                                 | 85.65(10)  | P3-Au3-Au3#1 | 101.82(11) |
| S4-Au3-Au4                 | 94.41(10)  | S4-Au3-Au4                                | 94.41(11)  | S5-Au3-Au4                                                 | 81.82(11)  | S3-Au3-Au3#1 | 79.19(12)  |
| Au2-Au3-Au4                | 136.05(2)  | Au2-Au3-Au4                               | 163.23(3)  | S4-Au3-Au4                                                 | 98.12(9)   | P3-Au3-Au2   | 110.21(10) |
| P2-Au4-S6                  | 172.63(10) | P2-Au4-S6                                 | 171.52(14) | Au2-Au3-Au4                                                | 167.82(3)  | S3-Au3-Au2   | 75.62(10)  |
| P2-Au4-Au3                 | 102.52(7)  | P2-Au4-Au3                                | 100.51(10) | P2-Au4-S6                                                  | 169.86(13) | Au3#1-Au3-Au | 116.66(4)  |
| S6-Au4-Au3                 | 84.78(7)   | S6-Au4-Au3                                | 86.55(11)  | P2-Au4-Au3                                                 | 102.27(8)  | Au1-Au2-Au3  | 142.12(3)  |
| P1-Au1-S1                  | 172.72(11) | S7-Au5-S8                                 | 75.15(15)  | S6-Au4-Au3                                                 | 87.67(10)  |              |            |

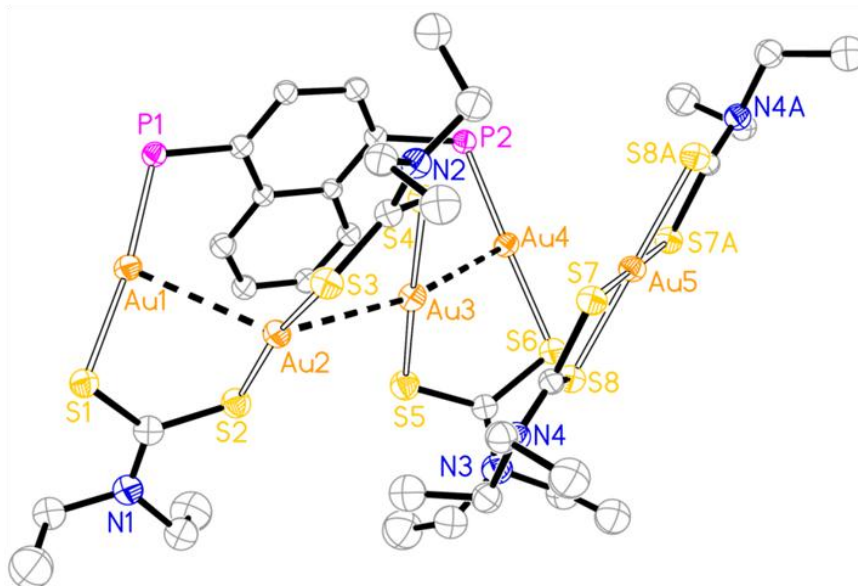

**Fig. S1.** ORTEP drawings of cationic complex **4** with atom-labeling scheme showing 30% thermal ellipsoids. Phenyl rings on the phosphorus atoms and all hydrogen atoms are omitted for clarity.

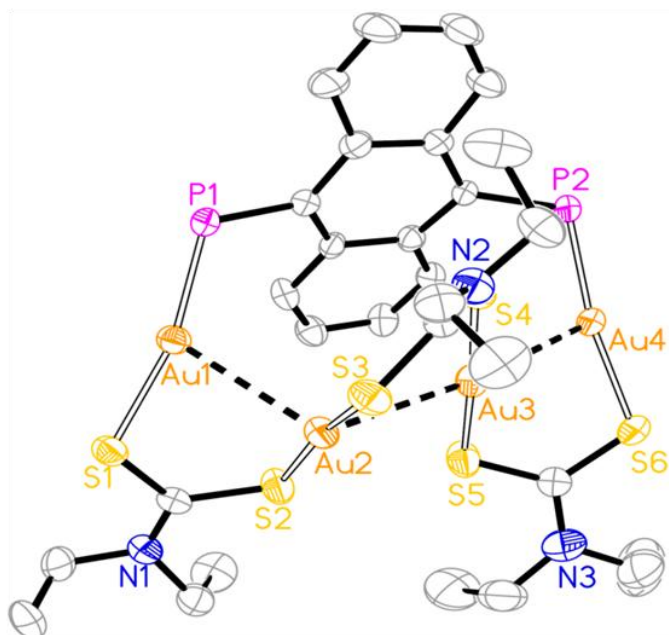

**Fig. S2.** ORTEP drawings of cationic complex **5** with atom-labeling scheme showing 30% thermal ellipsoids. Phenyl rings on the phosphorus atoms and all hydrogen atoms are omitted for clarity.

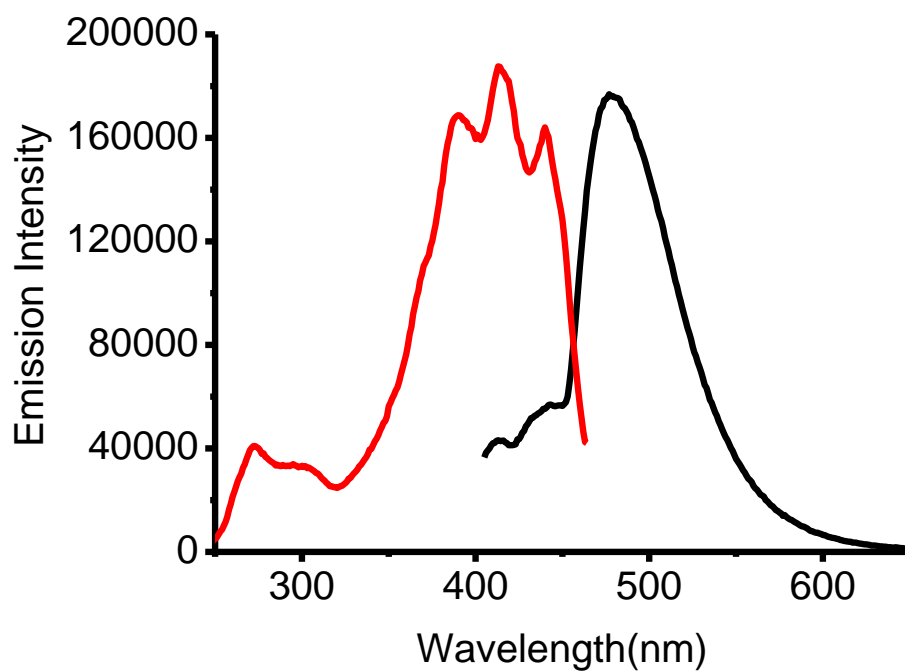

**Fig. S3.** Excitation and emission spectra of complex **5** in  $\text{CH}_2\text{Cl}_2$  solution at 298 K.

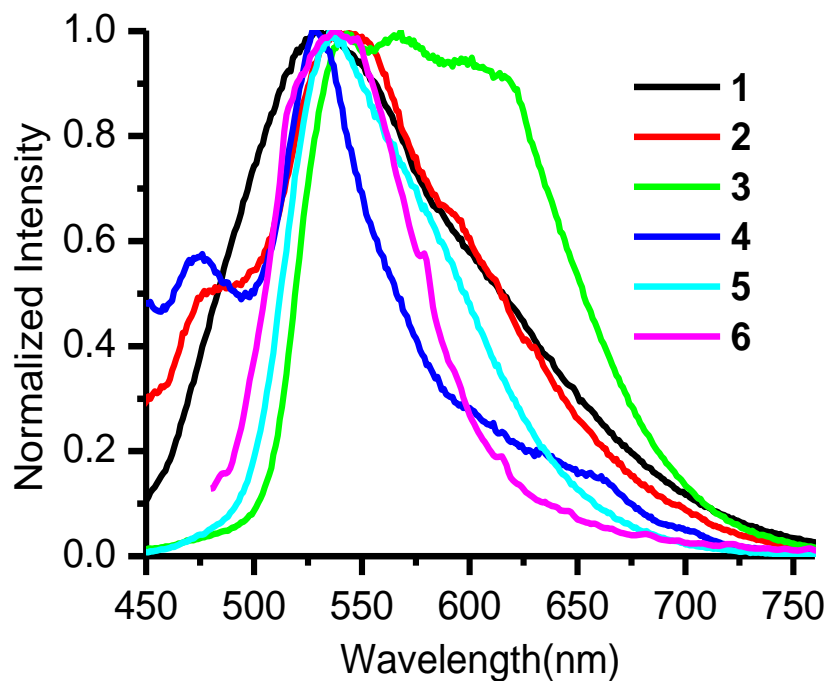

**Fig. S4.** Solid-state emission spectra of complexes **1–6** at 298 K.

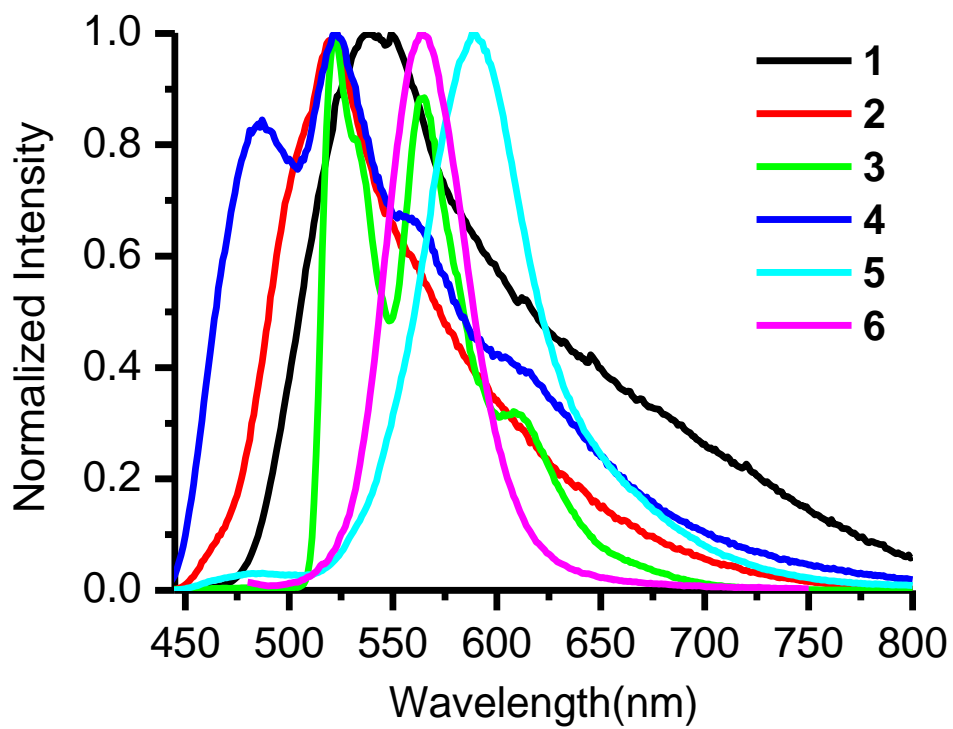

**Fig. S5.** Solid-state emission spectra of complexes **1–6** at 77 K.
